# Supplementary material
Source: PubMed Central journal article supplement (PMC5037571)

## 1 **Supplementary Material:**

### 2 **Introduction:**

3 Primary immunodeficiency diseases (PIDs) are highly heterogeneous conditions that would  
4 benefit from the application of NGS in clinical testing. In most cases PIDs are monogenic and  
5 follow simple Mendelian inheritance. However, disease penetrance and expression variability as  
6 well as interactions between genetic and environmental factors can contribute to the wide range  
7 of phenotypic diversity observed across PIDs.<sup>1</sup> More than 220 PIDs have been described in the  
8 scientific literature to date and new PIDs continue to be reported.<sup>2,3</sup>

9 Previous attempts to identify the causal mutations underlying PIDs primarily entailed positional  
10 cloning or candidate gene sequencing based on known signaling pathways and phenotypic  
11 similarity of disease in patients and available murine models. Investigators have also used  
12 genome-wide association (GWA) approaches, which led to the discovery of multiple novel  
13 common variable immunodeficiency (CVID) susceptibility loci.<sup>4</sup> The use of high throughput  
14 NGS technology has helped explain novel causes of some PIDs. Over the last few years, a number  
15 of publications have reported newer molecular defects in PID by next generation sequencing technology.  
16 Recent examples include the use of WES in identifying mutations in *IKBKB* as a cause of combined  
17 immunodeficiency, *CSF3R* as a cause of congenital neutropenia, and *CTPS1* associated with defective  
18 lymphocyte proliferation and severe EBV infection.<sup>5,6,7</sup>

19 With the continued discovery of newer molecular defects in PID, keeping up with the growing  
20 literature on inherited mutations in PID can be tedious and time consuming. However, several  
21 useful online databases are available to researchers. The Human Gene Mutation Database  
22 (<http://www.hgmd.org>) is a comprehensive collection of mutations in nuclear genes that underlie  
23 or are associated with human inherited disease. A valuable database for primary

24 immunodeficiency is the Resource of Asian Primary Immunodeficiency Disease (RAPID). This  
25 is a freely accessible database that contains information on sequence variation, as well as  
26 expression at the mRNA and protein levels, in genes reported from PID patients.

27 Severe combined immunodeficiency (SCID) is a fatal PID syndrome characterized by profound  
28 deficiencies of T and B cell function. It is known to be caused by mutations in at least 13  
29 different genes,<sup>8,9</sup> but there are still SCID patients whose mutations remain unknown. Less  
30 severe combined immunodeficiency (CID) is characterized by impaired but not absent T and B  
31 cell function. While some CID patients have hypomorphic mutations in known SCID-associated  
32 genes, the causal mutations for many CID patients remain elusive. Similarly, although causative  
33 mutations for hyper IgM syndrome (HIGM) have been found in five different genes,<sup>10,110</sup> many  
34 patients still lack identification of the causal gene mutation. Chronic granulomatous disease  
35 (CGD) is caused by mutations in five NADPH oxidase structural genes (*CYBB*, *CYBA*, *NCF1*,  
36 *NCF2*, and *NCF4*).<sup>12</sup> Mutations in *CYBB* (gp91phox) cause X-linked CGD and account for  
37 nearly two thirds of cases. All other described CGD cases have an autosomal recessive pattern of  
38 inheritance.

### 39 **Methods:**

40 All patients were followed at the Immune Deficiency Foundation's Duke University Primary  
41 Immunodeficiency Center of Excellence. All studies were performed with the approval of the  
42 Duke University Medical Center's Institutional Review Board and with the written informed  
43 consent of the patients or their parents.

44 *Whole Genome Sequencing:*

45 WGS was accomplished using paired-end sequencing on the Illumina HiSeq2000 with average  
46 coverage 39.5 (SD 5.8, range: 33.6-50.0). Reads were aligned to the Human Reference Genome  
47 (NCBI36) using BWA software.<sup>13</sup> Single nucleotide variants (SNVs) and insertions/deletions  
48 (INDELs) were called and genotypes assigned using SAMtools.<sup>14</sup> Control samples (n>160) were  
49 sequenced contemporaneously in the same laboratory, and variants were called and annotated in  
50 a manner similar to the patient genomes.

51 *Identification of likely causal variants:*

52 The WGS screens were designed to interrogate highly penetrant genotypes that might account  
53 for each patient's PID. Patients were screened for putatively functional rare variants that were  
54 absent in a cohort of >160 unrelated control subjects and were absent or at very low frequencies  
55 in the Exome Variant Server (EVS, NHLBI GO Exome Sequencing Project (ESP), Seattle, WA  
56 [URL: <http://evs.gs.washington.edu/EVS/>]) public database. High-quality variants were  
57 annotated using the Sequence Variant Analyzer (SVA [URL: <http://www.svaproject.org/>]).<sup>15</sup>  
58 Standard filtering criteria were applied (SNV quality, SNV consensus score, INDEL consensus  
59 score  $\geq 20$ , INDEL quality  $\geq 50$ , number of reads supporting SNV or INDEL  $\geq 3$ ). As variants  
60 with known or predicted functional consequences are more likely to be causal of such deleterious  
61 phenotypes, only functional variants were further considered: missense and nonsense SNVs, stop  
62 loss SNVs, frameshift INDELs, and splice site mutations, or structural variants that overlapped  
63 genes. Functional variants present in the proband were prioritized as potentially causal as  
64 follows: (1) a homozygous (including hemizygous X variants) genotype lacking homozygosity in  
65 controls (recessive and X-linked variants) (MAF<0.02); (2) a compound heterozygous  
66 (MAF<0.03 for each participating variant) genotype that was not observed together in any  
67 controls. Known PID genes were included in the initial evaluation of candidate variants lists

68 generated from these tests. Candidate variants were then further prioritized by gene ontology,  
69 with higher weight given to variants in genes with a known role in immune function or known  
70 expression in relevant cell types. When no interesting genes were identified by these criteria,  
71 heterozygous genotypes in patients with very low frequencies in controls (MAF<0.02) were also  
72 included. This served as an indirect screen for compound heterozygosity that could have been  
73 missed on our initial screen, either due to low coverage of one of the two causal mutations, or  
74 because one of the two causal variants was a copy number variant (CNV).

75 *Identification of structural variation:*

76 Structural variations (including INDELs, deletions, duplications, and CNVs) were identified  
77 using ERDS (Estimation by Read Depth with SNVs, version 1.06 [URL:  
78 <http://people.duke.edu/~mz34/erds.htm>]) software.<sup>16</sup> ERDS primarily uses a paired Hidden  
79 Markov Model to analyze high-coverage WGS data combining read depth, paired-end,  
80 polymorphism, and structural variant signature information with GC corrections. CNVs were  
81 detected with default ERDS parameters.<sup>16</sup>

82 *DCLRE1C splicing studies:*

83 Plasmids:

84 Each human *DCLRE1C* exon, including ~300 bp of flanking intronic sequence, was amplified  
85 from genomic DNA derived from peripheral blood mononuclear cells (PBMCs) of healthy  
86 volunteers using PrimeSTAR GXL DNA Polymerase (Takara). *DCLRE1C* exons were  
87 subcloned into the pCR-Blunt II-TOPO vector (Life Technologies) and sequenced. Using pCR-  
88 Blunt II-Exon1 and pCR-Blunt II-*DCLRE1C*-Exon5 as templates, the IVS1+1 G>T and IVS5+2  
89 T>A mutants (c.109+1G>T and c.362+2T>A, respectively) were made by PCR-directed

90 mutagenesis using PfuUltra II Fusion HS DNA Polymerase. The products were phosphorylated  
91 by T4 polynucleotide kinase (New England BioLabs), self-ligated using T4 DNA ligase  
92 (Promega), and sequenced. Genomic DNA encoding exons 1 to 3 and exons 3 to 6 were  
93 subcloned into pcDNA3.1(+) vector generating the minigene 1 and minigene 5 wild type (WT)  
94 and mutant constructs respectively.

95 The 5' and 3' ends of the human *DCLRE1C* cDNA sequence were amplified with PrimeSTAR  
96 GXL DNA Polymerase. These were subcloned into the pCR-Blunt II-TOPO vector and  
97 subjected to sequence analysis (pCR-Blunt II-*DCLRE1C*-A-WT and pCR-Blunt II-*DCLRE1C*-B-  
98 WT). Using pCR-Blunt II-*DCLRE1C*-A-WT, the  $\Delta$ exon5 isoform of *DCLRE1C* was made by  
99 PCR-directed mutagenesis to remove exon 5 as described above. A FLAG-tag was also added to  
100 each isoform by PCR-directed mutagenesis. FLAG-tagged full length cDNAs encoding  
101 *DCLRE1C* were subcloned into pcDNA3.1(+) vector creating pcDNA3.1(+)-*DCLRE1C*-WT-  
102 FLAG, and pcDNA3.1(+)-*DCLRE1C*- $\Delta$ exon5-FLAG constructs.

### 103 Minigene assays

104 Empty pcDNA3.1 (+) vector, minigene-1WT, minigene-1mutant, minigene-5WT and minigene-  
105 5mutant were transfected into COS-7 using Lipofectamine 2000 according to standard protocol.  
106 Total RNA was extracted from transfectants after 24 hours and first-strand cDNA encoding the  
107 human *DCLRE1C* minigene was synthesized. *DCLRE1C* minigene transcript expression levels  
108 were detected by semi-quantitative RT-PCR and sequenced. The transcripts of minigene-1WT  
109 minigene-1mutant were also detected by quantitative RT-PCR using Taqman one-step PCR  
110 Master Mix (Life Technologies) (primer list Table E1).

### 111 Immunoblotting

112 Empty pcDNA3.1 (+) vector, pcDNA3.1(+)-*DCLRE1C*-WT-FLAG, or pcDNA3.1(+)-  
113 *DCLRE1C*- $\Delta$ exon5-FLAG were transfected into COS-7 cells. Cells were lysed with a solution of  
114 RIPA Buffer (Sigma Aldrich), 1X 0.5M EDTA and 1X protease inhibitor (ThermoScientific)  
115 48h after transfection. Lysates were subjected to SDS-PAGE gel and transferred to a  
116 polyvinylidene difluoride membrane (Millipore). The membranes were incubated with anti-  
117 FLAG antibody (1:2000; Sigma Aldrich) or anti- $\beta$ -actin (1:10,000; Cell Signaling Technology).  
118 Proteins were visualized with the ECL Plus Western Blotting Detection System (GE Healthcare).  
119 Verification of variants and communication of results to families  
120 All families underwent genetic counselling at our Immunology clinic at the time of participation.  
121 The identified variants were confirmed in a CLIA certified laboratory prior to communication to  
122 the families.

### 123 **Supplementary Discussion:**

124 To date, we have performed WGS on 12 PIDD cases. We identified the causal mutation in 6  
125 (discussed here). Hence we had a success rate of 50% in identifying the disease causing  
126 mutation.

127 The use of NGS is accepted for investigating undiagnosed genetic conditions. NGS adds  
128 considerable value through its ability to both identify novel and rare mutations in known genes  
129 and to investigate a broader range of genes than by targeted gene testing.

130 Commercial laboratories are limited by the nature and cost of targeted gene testing; and  
131 sometimes only gene regions that harbor the majority of previously identified mutations are  
132 screened. For patients 1 and 2, the causal mutation in exon 7 of *NCF1* was missed by targeted

133 gene testing because the commercial *NCF1* screen only examined mutations in exon 2, which  
134 harbors the 2GT deletion that causes most reported cases of *NCF1*-related CGD.<sup>17</sup> It remains  
135 unclear why the missense mutation in *CD40LG* we identified in patient 3 was missed by the  
136 CLIA certified laboratory. Of note, measurement of CD40L function by assessing the binding of  
137 CD40L to the soluble receptor, CD40-muIg is available as a clinical test.

138 Patient 4 was initially only screened for mutations in *RAG1* and *RAG2*, the only known causes  
139 of NK phenotype SCID at the time of her diagnosis.<sup>18</sup> The Artemis encoding *DCLRE1C* gene  
140 was subsequently also found to cause NK phenotype SCID.<sup>19</sup> Hypomorphic *DCLRE1C*  
141 mutations have also been reported as a cause of partial T and B lymphocyte immunodeficiency.  
142 <sup>20</sup> The *DCLRE1C* gene is prone to deletions involving one or more of its 14 exons.<sup>21</sup> One study  
143 analyzing *DCLRE1C* mutations in SCID patients found that 60% of alleles had a large deletion,  
144 mostly involving exons 1-3.<sup>22</sup> Patient 4 in our study was found to be homozygous for the 82kb  
145 deletion involving exons 1-4 in *DCLRE1C* (Figure E 1A).

146 The defect in patient 5 was also missed by a CLIA-certified laboratory when she was tested for  
147 *DCLRE1C* mutations, as targeted gene testing at that time lacked the ability to identify gross  
148 deletions and was only able to discern non-diagnostic heterozygosity. Patient 6 was the only  
149 patient initially screened via WGS. It is worth noting that, even if patient 6 had undergone full  
150 SCID candidate gene testing (at significant expense), the cause may have been missed unless an  
151 exon array or a multiplex ligation-dependent probe amplification was performed to determine the  
152 copy number of the *DCLRE1C* gene, as with patient 5.

153 Defects involving *DCLRE1C* gross deletions as we observed in patients 4-6 would likely have  
154 been missed by targeted gene testing technology generating ambiguous results due to PCR

155 failure in Sanger sequencing. Even WES may have missed this causal mutation, since inferring  
156 CNVs is much more challenging and less reliable with exome data.<sup>23</sup>

157 The cost of clinical genetic testing in these patients is important to address. For patients 1 and 2,  
158 the cost for testing *NCF1*, *NCF2* and *CYBA* at a CLIA-certified commercial laboratory was  
159 \$3200 per patient.

160 Of note, the current cost of sequencing in our research laboratory is around \$3200 for WGS and  
161 \$650 for WES. The current standard turnaround time for WES and WGS at the CHGV (research  
162 lab) is 49 days. For urgent cases, rapid sequencing can be done at the CHGV in about 2 weeks.  
163 Standard turnaround time will vary by research or clinical laboratory. Interestingly, one group  
164 reported a system that permits WGS with bioinformatics analysis of suspected genetic disorders  
165 within 50 hours. This time frame is very promising for emergency use when rapid diagnosis is  
166 needed in an emergency or critical care setting.<sup>24</sup>

167 NGS panels for a selected group of genes have become commercially available and are proving  
168 to be more popular and economical than sequencing individual genes. One recent report suggests  
169 that NGS-based evaluation may be used as a first line genetic test for cases of PID.<sup>25</sup>  
170 Furthermore, NGS may be clinically and economically beneficial in patients who remain  
171 undiagnosed despite traditional genetic diagnostic evaluations.<sup>26</sup>

172 “Next-generation sequencing (NGS) has been clearly shown to be a successful approach in  
173 identifying causes of Mendelian diseases, even when the condition is seen in a single patient.  
174 Variations in data generation across platforms and methods of data interpretation can be  
175 challenging in this context, particularly when disease causing variation is very rare and present in  
176 only a single family. However, a set of criteria has recently been proposed for deciding if the



177 clinical and experimental data are sufficient to establish a causal relationship with only one  
178 affected individual.<sup>27</sup> There are challenges associated with NGS technology, including the  
179 complexity of data analysis and the potential for the mapping and variant calling algorithms to  
180 miss variants. Reliability of NGS data analysis is highly dependent on the choice of a reliable  
181 control cohort of high quality and depth. In addition, this technology requires extensive interplay  
182 between geneticists, clinicians and bioinformaticians and the analysis can be very complex.

183 It is also likely that a small proportion of the genome will remain refractory to NGS. WES and  
184 WGS offer the advantage of interrogating the entire genome, rather than being limited to only  
185 likely gene candidates, and WGS may prove to be faster and less expensive than targeted gene  
186 approaches in many cases.

187 Though the patients studied already had a clinical diagnosis, determining the underlying genetic  
188 causes of their diseases is important for several reasons. First, it may impact clinical care. For  
189 example, patients with Artemis deficiency are at an increased risk for deleterious effects from  
190 ionizing radiation. In addition, we have found that patients and families lacking a definitive  
191 genetic diagnosis have emotional distress from lack of information regarding genetic counseling  
192 and uncertainty regarding potential future impact on subsequent pregnancies.

193 The choice between performing WGS or WES is not an easy one. WES is less expensive and  
194 more readily available, but can miss disease causing mutations in noncoding regions. Examples  
195 include intronic *GATA2* mutations in patients with MonoMAC syndrome<sup>28</sup> and a mutation in the  
196 5' untranslated region of *IKBKG* (NEMO) in X-linked Ectodermal Dysplasia with  
197 immunodeficiency.<sup>29</sup> Identification of large structural variations such as deletions was formerly

198 problematic with WES. However, recent new analytical approaches make it possible to screen  
199 for clinically relevant CNVs using existing exome-based CNV detection methods.<sup>30</sup>

200 In summary, this work suggests that the application of NGS should be strongly considered in all  
201 PID cases where the initial studies have not determined the molecular etiology of disease.

202

203

204

205 **Supplementary Figure Legends:**

206 **Supplementary Figure E1:** Detection of CNVs by ERDS. A read depth (RD) of 40 indicates  
207 that both copies of the gene are present; RD of 20 suggests that 1 gene copy is missing; RD of 0  
208 suggests that both gene copies are missing. Detection of 82kb deletion on chromosome 10  
209 including exons 1-4 of *DCLRE1C* in patient 4 (A), 5 (B) and 6 (C). The deletion is homozygous  
210 in patient 4.

211 **Supplementary Figure E2:** Sanger confirmation of IVS1+G>T and IVS5+2T>A *DCLRE1C*  
212 variant constructs.

213 **Supplementary Table E1:** Primer list; Abbreviations “F” and R” are forward and reverse  
214 primers respectively.

215 **Supplementary Bibliography:**

216 E1. Notarangelo LD. Primary immunodeficiencies. J Allergy Clin Immunol. 2010 Feb;125(2  
217 Suppl 2):S182-94.

- 218 E2. Parvaneh N, Casanova JL, Notarangelo LD, Conley ME. Primary immunodeficiencies: a  
219 rapidly evolving story. *J Allergy Clin Immunol*. 2013 Feb;131(2):314-23.
- 220 E3. Al-Herz W, Bousfiha A, Casanova JL, Chatila T, Conley ME, Cunningham-Rundles C, et  
221 al. Primary immunodeficiency diseases: an update on the classification from the international  
222 union of immunological societies expert committee for primary immunodeficiency. *Front*  
223 *Immunol*. 2014 Apr 22;5:162.
- 224 E4. Orange JS, Glessner JT, Resnick E, Sullivan KE, Lucas M, Ferry B, et al. Genome-wide  
225 association identifies diverse causes of common variable immunodeficiency. *J Allergy Clin*  
226 *Immunol*. 2011 Jun;127(6):1360-7 e6.
- 227 E5. Triot A, Järvinen PM, Arostegui JI, Murugan D, Kohistani N, Dapena Díaz JL, et al.  
228 Inherited biallelic CSF3R mutations in severe congenital neutropenia. *Blood*. 2014 Jun  
229 12;123(24):3811-7.
- 230 E6. Mousallem T, Yang J, Urban T, Wang H, Adeli M, Parrott RE, et al. A nonsense  
231 mutation in IKBKB causes combined immunodeficiency. *Blood*. 2014 Sep 25;124(13):2046-50.
- 232 E7. Martin E, Palmic N, Sanquer S, Lenoir C, Hauck F, Mongellaz C, et al. CTP synthase 1  
233 deficiency in humans reveals its central role in lymphocyte proliferation. *Nature*. 2014 Jun  
234 12;510(7504):288-92.
- 235 E8. Buckley RH. Transplantation of hematopoietic stem cells in human severe combined  
236 immunodeficiency: longterm outcomes. *Immunol Res*. 2011 Apr;49(1-3):25-43.

- 237 E9. Pannicke U, Honig M, Hess I, Friesen C, Holzmann K, Rump EM, et al. Reticular  
238 dysgenesis (aleukocytosis) is caused by mutations in the gene encoding mitochondrial adenylate  
239 kinase 2. *Nat Genet.* 2009 Jan;41(1):101-5.
- 240 E10. Durandy A, Taubenheim N, Peron S, Fischer A. Pathophysiology of B-cell intrinsic  
241 immunoglobulin class switch recombination deficiencies. *Adv Immunol.* 2007;94:275-306.
- 242 E11. Kracker S, Gardes P, Durandy A. Inherited defects of immunoglobulin class switch  
243 recombination. *Adv Exp Med Biol.* 2010;685:166-74.
- 244 E12. Matute JD, Arias AA, Wright NA, Wrobel I, Waterhouse CC, Li XJ, et al. A new genetic  
245 subgroup of chronic granulomatous disease with autosomal recessive mutations in p40 phox and  
246 selective defects in neutrophil NADPH oxidase activity. *Blood.* 2009 Oct 8;114(15):3309-15.
- 247 E13. Li H, Durbin R. Fast and accurate short read alignment with Burrows-Wheeler transform.  
248 *Bioinformatics.* 2009 Jul 15;25(14):1754-60.
- 249 E14. Li H, Handsaker B, Wysoker A, Fennell T, Ruan J, Homer N, et al. The Sequence  
250 Alignment/Map format and SAMtools. *Bioinformatics.* 2009 Aug 15;25(16):2078-9.
- 251 E15. Ge D, Ruzzo EK, Shianna KV, He M, Pelak K, Heinzen EL, et al. SVA: software for  
252 annotating and visualizing sequenced human genomes. *Bioinformatics.* 2011 Jul 15;27(14):1998-  
253 2000.
- 254 E16. Zhu M, Need AC, Han Y, Ge D, Maia JM, Zhu Q, et al. Using ERDS to infer copy-  
255 number variants in high-coverage genomes. *Am J Hum Genet.* 2012 Sep 7;91(3):408-21.
- 256 E17. Noack D, Rae J, Cross AR, Ellis BA, Newburger PE, Curnutte JT, et al. Autosomal  
257 recessive chronic granulomatous disease caused by defects in NCF-1, the gene encoding the

258 phagocyte p47-phox: mutations not arising in the NCF-1 pseudogenes. *Blood*. 2001 Jan  
259 1;97(1):305-11.

260 E18. Schwarz K, Gauss GH, Ludwig L, Pannicke U, Li Z, Lindner D, et al. RAG mutations in  
261 human B cell-negative SCID. *Science*. 1996 Oct 4;274(5284):97-9.

262 E19. Moshous D, Callebaut I, de Chasseval R, Corneo B, Cavazzana-Calvo M, Le Deist F, et  
263 al. Artemis, a novel DNA double-strand break repair/V(D)J recombination protein, is mutated in  
264 human severe combined immune deficiency. *Cell*. 2001 Apr 20;105(2):177-86.

265 E20. Moshous D, Pannetier C, de Chasseval R, le Deist F, Cavazzana-Calvo M, Romana S, et  
266 al. Partial T and B lymphocyte immunodeficiency and predisposition to lymphoma in patients  
267 with hypomorphic mutations in Artemis. *Journal of Clinical Investigation*. 2003 Feb;111(3):381-  
268 7.

269 E21. van Zelm MC, Geertsema C, Nieuwenhuis N, de Ridder D, Conley ME, Schiff C, et al.  
270 Gross deletions involving IGHM, BTK, or Artemis: A model for genomic lesions mediated by  
271 transposable elements. *American Journal of Human Genetics*. 2008 Feb;82(2):320-32.

272 E22. Pannicke U, Honig M, Schulze I, Rohr J, Heinz GA, Braun S, et al. The most frequent  
273 DCLRE1C (ARTEMIS) mutations are based on homologous recombination events. *Hum Mutat*.  
274 2010 Feb;31(2):197-207.

275 E23. Fromer M, Moran JL, Chambert K, Banks E, Bergen SE, Ruderfer DM, et al. Discovery  
276 and statistical genotyping of copy-number variation from whole-exome sequencing depth. *Am J*  
277 *Hum Genet*. 2012 Oct 5;91(4):597-607.

278 E24. Saunders CJ, Miller NA, Soden SE, Dinwiddie DL, Noll A, Alnadi NA, et al. Rapid  
279 whole-genome sequencing for genetic disease diagnosis in neonatal intensive care units. *Sci*  
280 *Transl Med.* 2012 Oct 3;4(154):154ra135.

281 E25. Nijman IJ, van Montfrans JM, Hoogstraat M, Boes ML, van de Corput L, Renner ED, et  
282 al. Targeted next-generation sequencing: A novel diagnostic tool for primary  
283 immunodeficiencies. *J Allergy Clin Immunol.* 2014 Feb;133(2):529-34.

284 E26. Shashi V, McConkie-Rosell A, Rosell B, Schoch K, Vellore K, McDonald M, et al. The  
285 utility of the traditional medical genetics diagnostic evaluation in the context of next-generation  
286 sequencing for undiagnosed genetic disorders. *Genet Med.* 2014 Feb;16(2):176-82.

287 E 27. Casanova JL, Conley ME, Seligman SJ, Abel L4, Notarangelo LD. Guidelines for genetic  
288 studies in single patients: lessons from primary immunodeficiencies. *J Exp Med.* 2014 Oct  
289 20;211(11):2137-49.

290 E28. Hsu AP, Johnson KD, Falcone EL, Sanalkumar R, Sanchez L, Hickstein DD, et al.  
291 GATA2 haploinsufficiency caused by mutations in a conserved intronic element leads to  
292 MonoMAC syndrome. *Blood.* 2013 May 9;121(19):3830-7, S1-7.

293 E29. Mooster JL, Cancrini C, Simonetti A, Rossi P, Di Matteo G, Romiti ML, et al. Immune  
294 deficiency caused by impaired expression of nuclear factor-kappaB essential modifier (NEMO)  
295 because of a mutation in the 5' untranslated region of the NEMO gene. *J Allergy Clin Immunol.*  
296 2010 Jul;126(1):127-32 e7.

297 E30. Kadalayil L, Rafiq S, Rose-Zerilli MJ, Pengelly RJ, Parker H, Oscier D, et al. Exome  
298 sequence read depth methods for identifying copy number changes. *Brief Bioinform.* 2014 Aug.

|                                                 | Primers                    | Sequence (5'-3')                   | Restriction Site incorporated |
|-------------------------------------------------|----------------------------|------------------------------------|-------------------------------|
| <b>Plasmid construction and sequencing</b>      |                            |                                    |                               |
| Minigene 1                                      | DCLRE1C-Exon1-F            | GCTAGCTTGGCTTCAGCTGCGGTTTT         | NheI                          |
|                                                 | DCLRE1C-Exon1-R            | CTTAAGCACCCAGCAAAGCTACCAAGA        | AfIII                         |
|                                                 | DCLRE1C-Exon2-F            | CTTAAGTCTCATTCTTCTGTGGCTGC         | AfIII                         |
|                                                 | DCLRE1C-Exon2-R            | AAGCTTCAAGTTCACAAACAGCCAAAGC       | HindIII                       |
|                                                 | DCLRE1C-Exon3A-F           | AAGCTTGCTCTTGGTGGCACTGAAAT         | HindIII                       |
|                                                 | DCLRE1C-Exon3A-R           | CTCGAGTTCGTTTCTTCCAAAATCTGTATTTTCG | XhoI                          |
| Minigene 5                                      | DCLRE1C-Exon3B-F           | GCTAGCCTGTTCACCTGTGACTAAGG         | NheI                          |
|                                                 | DCLRE1C-Exon3B-R           | CTTAAGTACAAGTGTGTGCCACGACA         | AfIII                         |
|                                                 | DCLRE1C-Exon4-F            | CTTAAGCATGGAAACAGAATTGTGTCAGAG     | AfIII                         |
|                                                 | DCLRE1C-Exon4-R            | AAGCTTGTAGTTTTGTGAGTCCAGCC         | HindIII                       |
|                                                 | DCLRE1C-Exon5-F            | AAGCTTTGTGAACAGTCAGGCACACA         | HindIII                       |
|                                                 | DCLRE1C-Exon5-R            | GGATCCAAACTCACTGCAGCCTCCAA         | BamHI                         |
|                                                 | DCLRE1C-Exon6-F            | GGATCCAAACTGGGTAGCATCTCCA          | BamHI                         |
|                                                 | DCLRE1C-Exon6-R            | CTCGAGTCACTGAAGTCAGGAGTTC          | XhoI                          |
| WT-DCLRE1C                                      | DCLRE1C-cDNA-A-F           | CTTAAGTTGGCTTCAGCTGCGGTTTT         | NheI                          |
|                                                 | DCLRE1C-cDNA-A-R           | TGCTCCTTTCTCCAAACCAC               |                               |
|                                                 | DCLRE1C-cDNA-B-F           | AGGAGTCCAGGTTTCATGTGA              |                               |
|                                                 | DCLRE1C-cDNA-B-R           | CTCGAGGTTGCTCTAGGTTGAAACGC         | XhoI                          |
| <b>Mutagenesis of Minigene 1 and Minigene 5</b> |                            |                                    |                               |
|                                                 | DCLRE1C-IVS1-mutagenesis-F | TTGAGTGAGGGCTGCG                   |                               |
|                                                 | DCLRE1C-IVS1-mutagenesis-R | CTTTGTGGCAGTGGGACA                 |                               |
|                                                 | DCLRE1C-IVS5-mutagenesis-F | GAAAGGGGGTCATTTATTTTGTCAATT        |                               |
|                                                 | DCLRE1C-IVS5-mutagenesis-R | ATAACTGATCCCGGACAGTG               |                               |
| <b>FLAG introduction</b>                        |                            |                                    |                               |
|                                                 | DCLRE1C-WT-FLAG-F1         | GACAAGTAAGAATTCAAAGCGTTTCAACCT     |                               |
|                                                 | DCLRE1C-WT-FLAG-R1         | GTAGTCGGTATCTAAGAGTGAGCATT         |                               |
|                                                 | DCLRE1C-WT-FLAG-F2         | GACGATGACAAGTAAGAATTCAAAGCGTTT     |                               |
|                                                 | DCLRE1C-WT-FLAG-R2         | GTCCTTGTAGTCGGTATCTAAGAGT          |                               |
|                                                 | DCLRE1C-IVS1-FLAG-F1       | GACAAGTGAGGGCTGCGCGT               |                               |
|                                                 | DCLRE1C-IVS1-FLAG-R1       | GTAGTCCTCAACTTTGTGGCAGTG           |                               |
|                                                 | DCLRE1C-IVS1-FLAG-F2       | GACGATGACAAGTGAGGGCTG              |                               |
|                                                 | DCLRE1C-IVS1-FLAG-R2       | GTCCTTGTAGTCCTCAACTTTGTGG          |                               |
|                                                 | DCLRE1C-IVS5-FLAG-F1       | GACAAGTAATGGAAGTGTCTGTACAC         |                               |
|                                                 | DCLRE1C-IVS5-FLAG-R1       | GTAGTCTTGCCCTGAAATAAAAACCTCTC      |                               |
|                                                 | DCLRE1C-IVS5-FLAG-F2       | GACGATGACAAGTAATGGAAGTGTCTCT       |                               |
|                                                 | DCLRE1C-IVS5-FLAG-R2       | GTCCTTGTAGTCTTGCCCTGAAATAAAAAC     |                               |
| <b>RT-PCR primers</b>                           |                            |                                    |                               |
| Control                                         | GAPDH-F                    | ACCACAGTCCATGCCATCA                |                               |
|                                                 | GAPDH-R                    | CACCACCCTGTTGCTGTAGCC              |                               |
| Minigene 1                                      | DCLRE1C-Exon1-F            | GCTAGCTTGGCTTCAGCTGCGGTTTT         |                               |
|                                                 | DCLRE1C-Exon3A-R           | CTCGAGTTCGTTTCTTCCAAAATCTGTATTTTCG |                               |
| Minigene 5                                      | DCLRE1C-Exon4F2            | ATCGAGACTCCTACCCAGAT               |                               |
|                                                 | DCLRE1C-Exon6R2            | GAGTGCAGAAGCTCCATTCT               |                               |
| FLAG constructs                                 | IVS-cDNA-RT-F              | CAGCTGCGGTTTGGGGTCC                |                               |
|                                                 | IVS1-muta-R                | CTTTGTGGCAGTGGGACA                 |                               |

Abbreviations 'F' and 'R' are forward and reverse primers respectively.

A

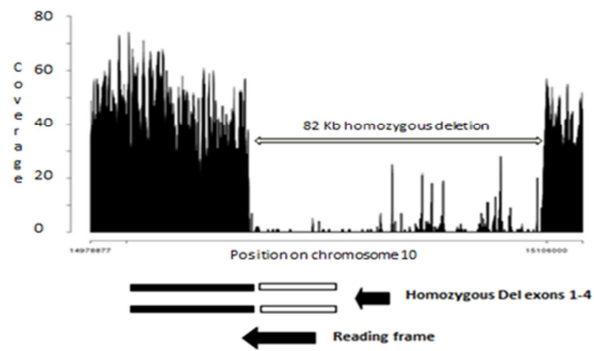

B

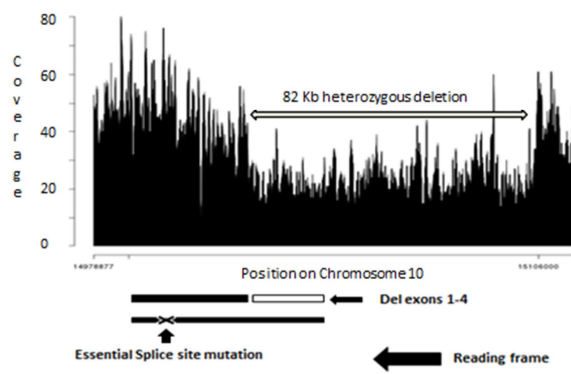

C

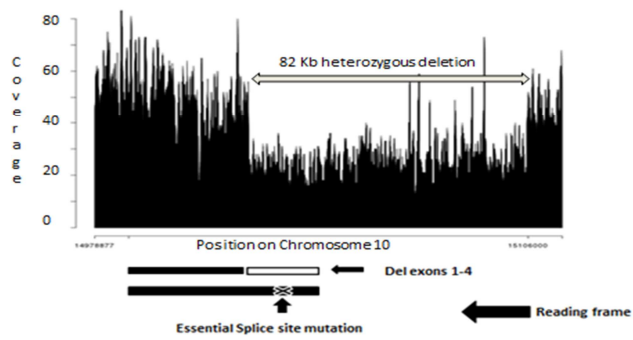



IVS1+1G>T

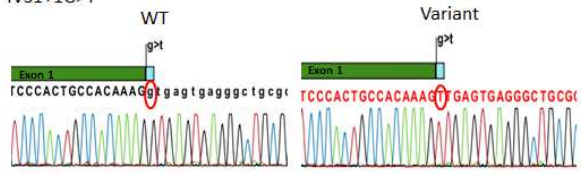

IVS5+2T>A

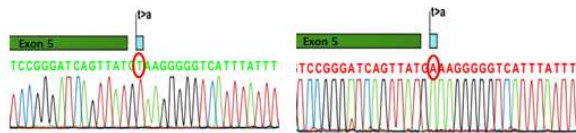

Supplement: NIHMS772756-supplement-supplement_1.pdf [file NIHMS772756-supplement-supplement_1.pdf]
